# Supplementary material for: The Crayfish Plague Pathogen <em>Aphanomyces astaci</em> in Ireland.
Source: Preprints.org preprint supplement (doi:10.20944/preprints202312.0039.v1), 2023-12-01
Supplement: Supplementary file 1 [file supplementary]

Supplementary information

**The Crayfish Plague Pathogen *Aphanomyces astaci* in Ireland**

1
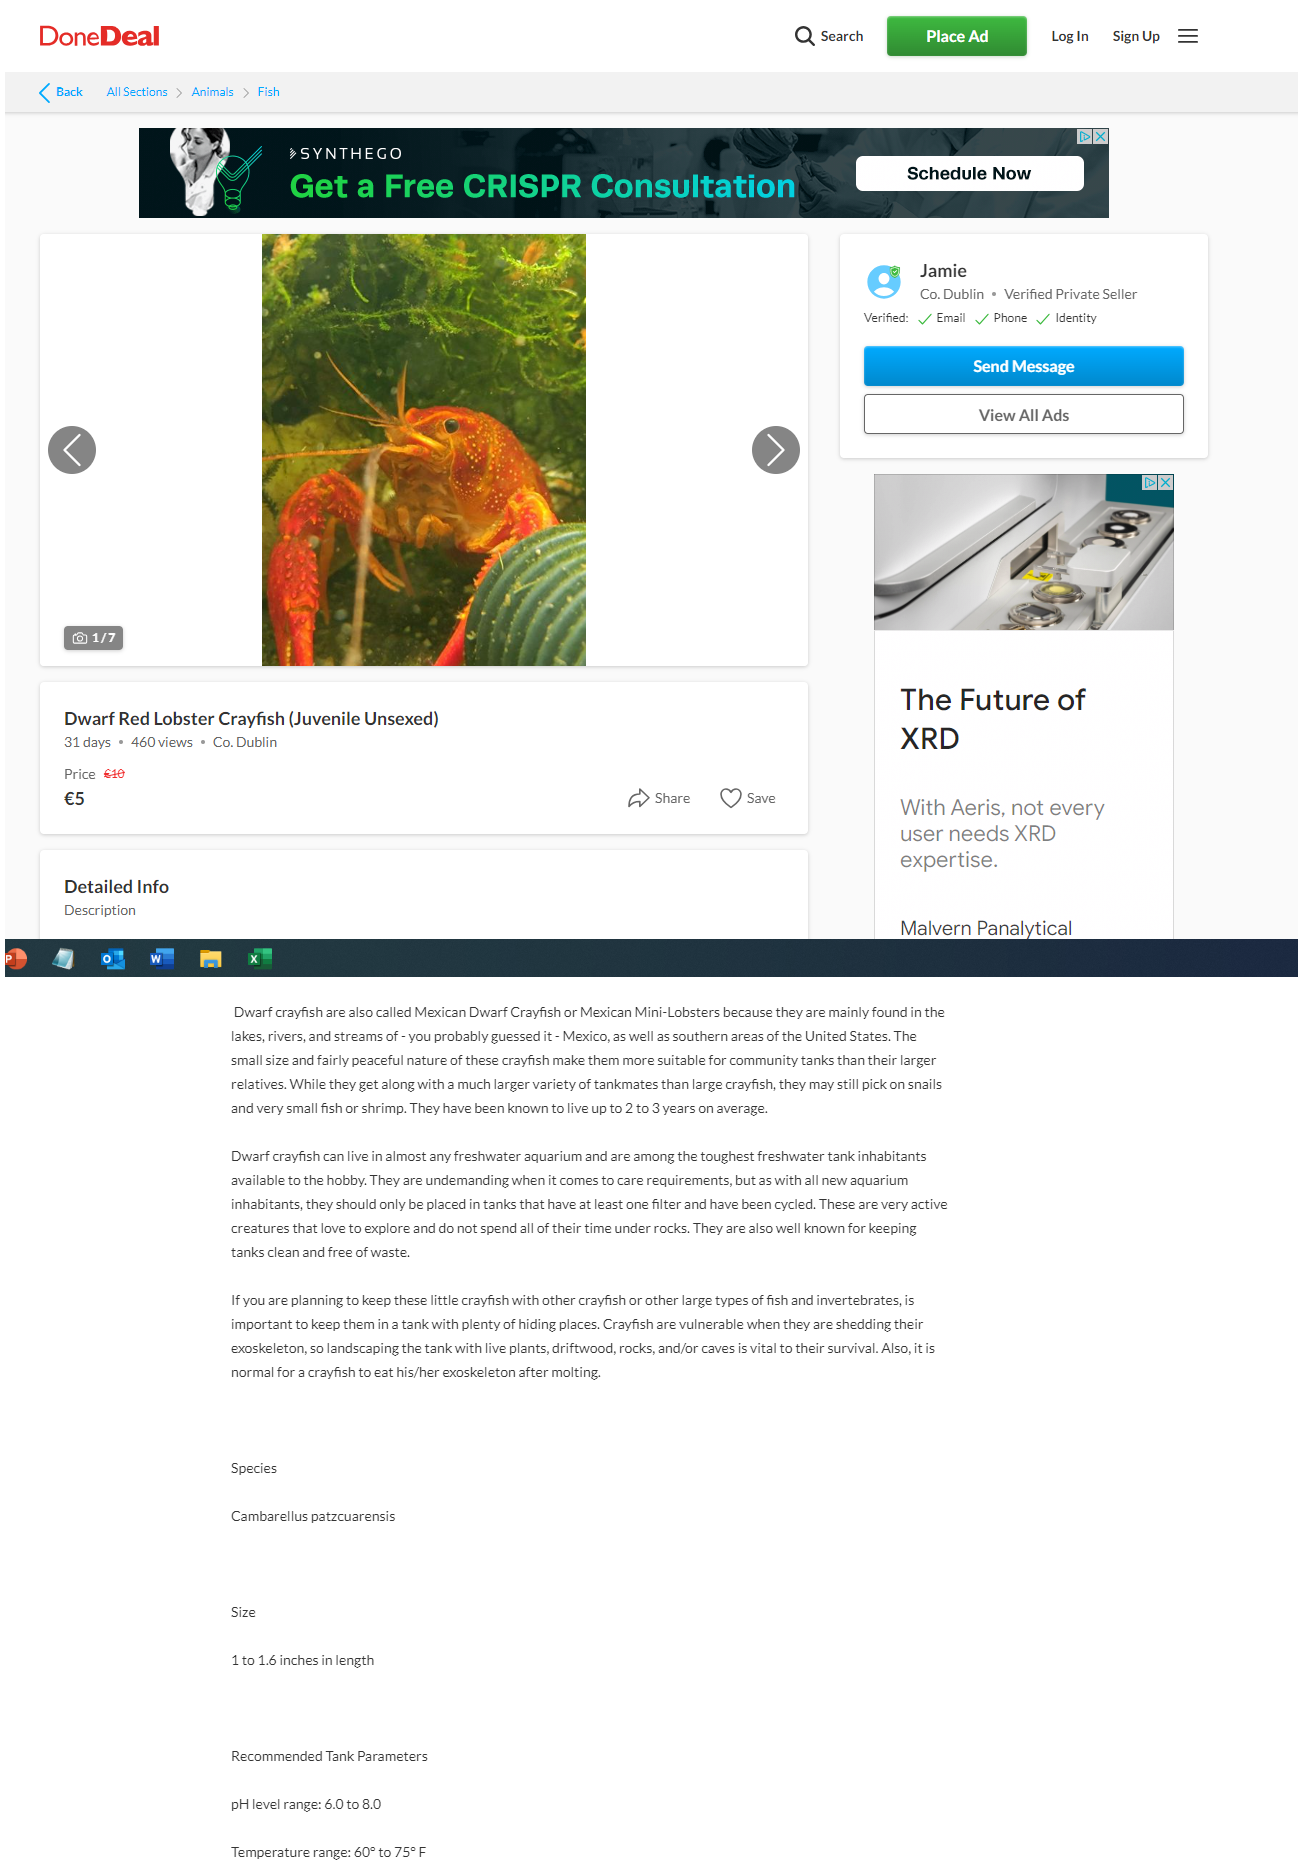


**Figure S1. An advertisment for Cambarellus patzcuarensis on DoneDeal in Ireland, September 2023**. The advert was online for a minimum of 43 days.
